# Supplementary material
Source: PubMed Central journal article supplement (PMC3447108)
Supplement: NIHMS403622-supplement-1_si_001.pdf [file NIHMS403622-supplement-1_si_001.pdf]

Caspase-Activated Cell-Penetrating Peptides Reveal Temporal Coupling Between  
Endosomal Release and Apoptosis in an RGC-5 Cell Model of Retinal Degeneration

**Supporting Information**

James R. Johnson<sup>†</sup>, Brandon Kocher<sup>†</sup>, Edward M. Barnett<sup>‡</sup>, Jayne Marasa<sup>†</sup>  
and David Piwnica-Worms<sup>†\*</sup>

<sup>†</sup> Molecular Imaging Center, Mallinckrodt Institute of Radiology, BRIGHT Institute,  
Departments of Cell Biology & Physiology, Developmental Biology, and <sup>‡</sup>Ophthalmology  
and Visual Sciences, Washington University School of Medicine, St. Louis, Missouri  
63110

Abbreviations: RGC; retinal ganglion cell, CPP; cell-penetrating peptide, SS;  
staurosporine

Correspondence:

David Piwnica-Worms, M.D., Ph.D.

BRIGHT Institute

Washington University School of Medicine

Campus Box 8225

510 S. Kingshighway Blvd., Box 8225

St. Louis, MO 63110-1016

Tele: 314-362-9356

Fax: 314-362-0152

Email: [piwnica-wormsd@mir.wustl.edu](mailto:piwnica-wormsd@mir.wustl.edu)

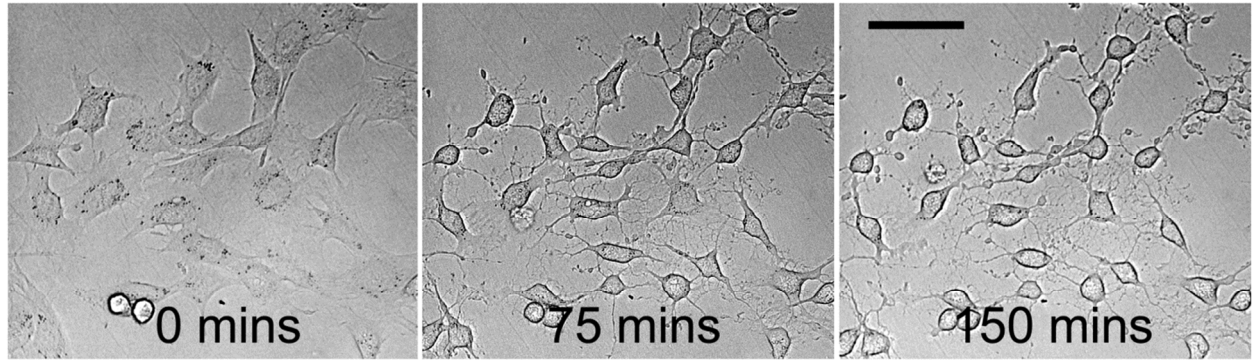

**Figure S1.** Transmitted light microscopy montage produced from a time lapse movie of RGC-5 cells undergoing SS-induced ( $0.5 \mu\text{M}$ ) differentiation. Times correspond to movie acquisition time (min). Image acquisition began 1 minute following SS exposure ( $50 \mu\text{m}$  scale bar).

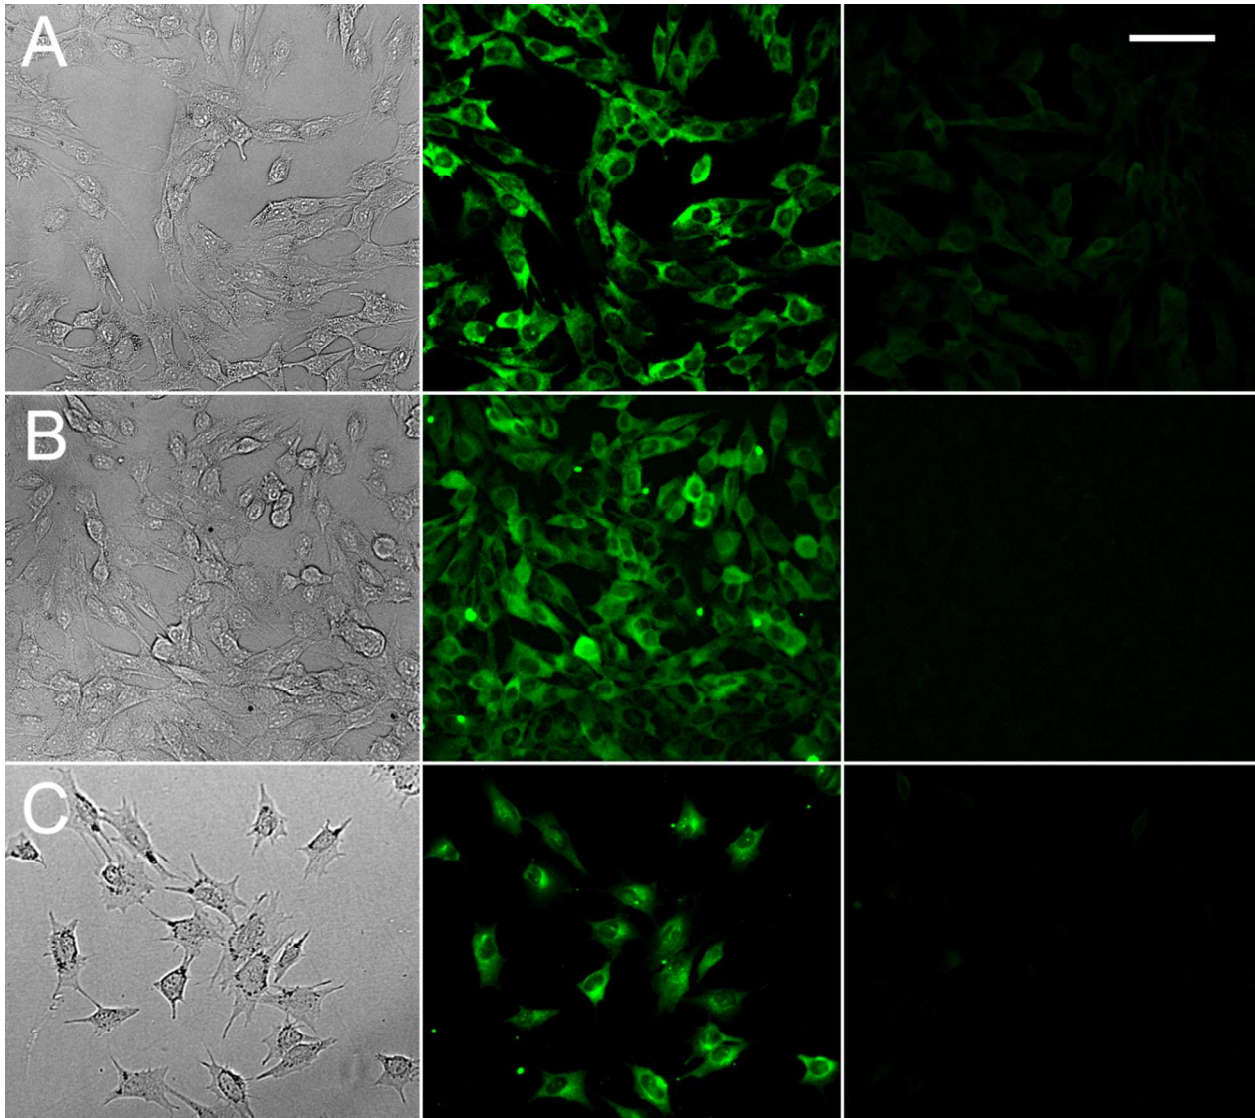

**Figure S2.** Immunohistochemical staining of neuronal markers in native RGC-5 cells. Fluorescence microscopy images of NF70 (row A), Thy-1 (row B) and NMDAR1 (row C) expression (bright field left, primary antibody labeling middle, and secondary antibody only right; 50  $\mu\text{m}$  scale bar).

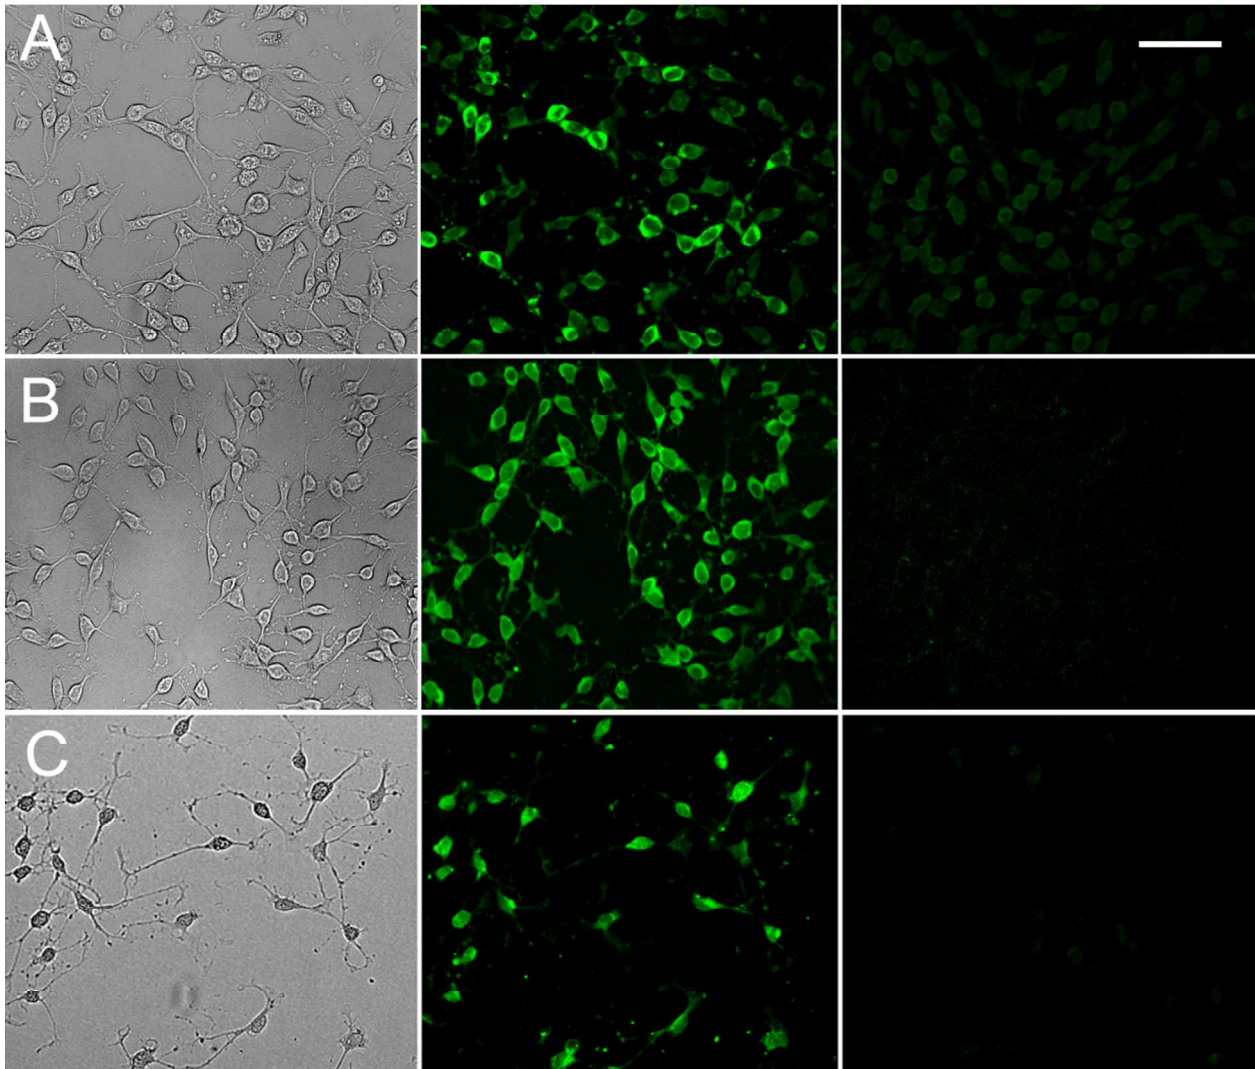

**Figure S3.** Immunohistochemical staining of neuronal markers in SS-differentiated RGC-5 cells. Fluorescence microscopy images of NF70 (row A), Thy-1 (row B) and NMDAR1 (row C) expression (bright field left, primary antibody labeling middle, and secondary antibody only right; 50  $\mu$ m scale bar).

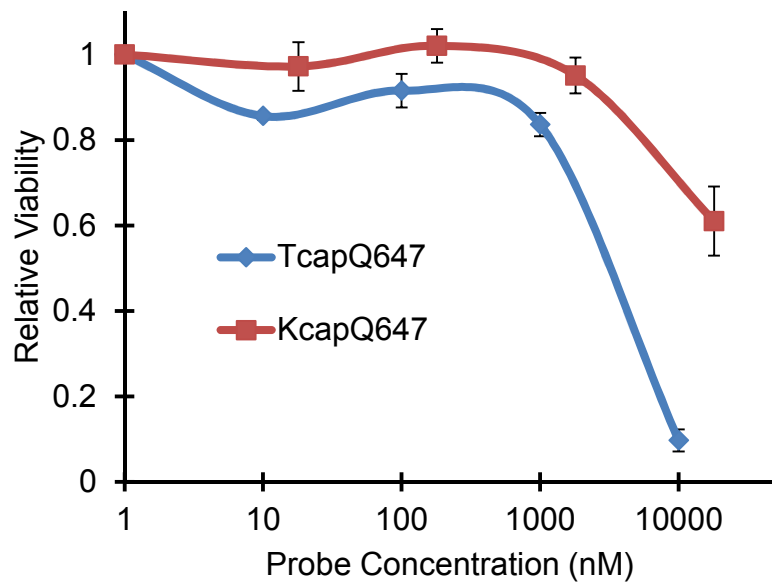

**Figure S4.** Alamar Blue cytotoxicity assays of CPP probes in native RGC-5 cells. RGC-5 cells were incubated with increasing concentrations of KcapQ647 (**1**) or TcapQ647 for 72 h before the addition of resazurin to assay cell viability. Data are presented as mean values  $\pm$  SEM ( $n = 3$  each).

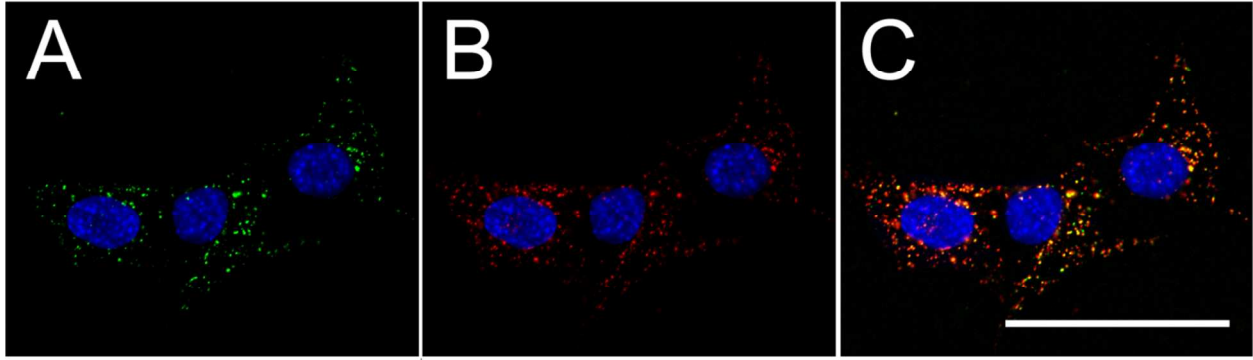

**Figure S5.** Fluorescence microscopy images of native RGC-5 cells following a 3 hour co-incubation with Kcap488 (4) (A) and Tcap647 (B). Overlay of panels A and B (C) showing co-localization (yellow) of each probe (50  $\mu\text{m}$  scale bar).

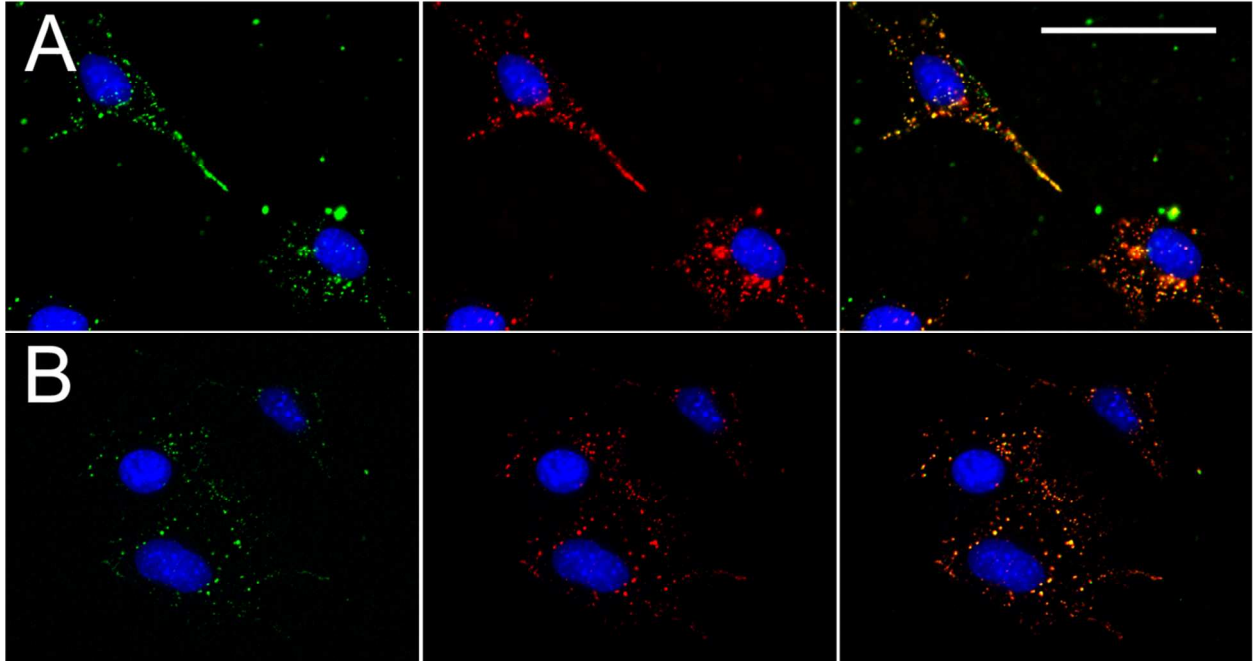

**Figure S6.** Fluorescence microscopy images of native RGC-5 cells following a 3 hour incubation with CF-albumin (A, left panel) or CF-dextran (B, left panel) and 10  $\mu$ M Kcap647 (**2**) (A and B, middle panels). Composite image showing co-localization (yellow) of internalized Kcap647 (red) and the respective endosomal marker (green) (A and B, right panels; 50  $\mu$ m scale bar).

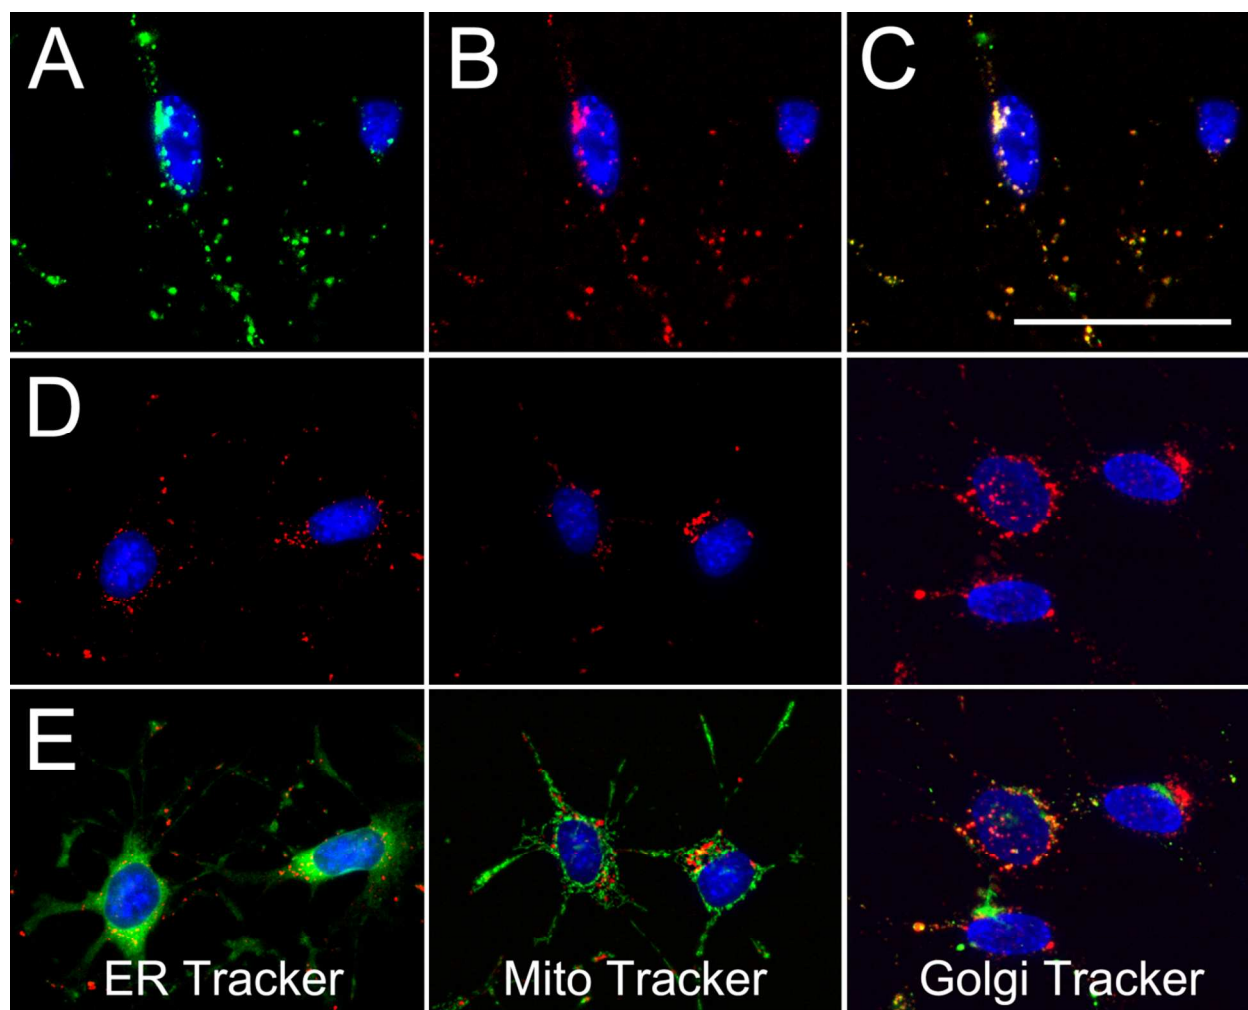

**Figure S7.** Fluorescence microscopy images of SS-differentiated RGC-5 cells following a 3 hour co-incubation with 10  $\mu\text{M}$  **4** (A) and 10  $\mu\text{M}$  **2** (B). Overlay of panels A and B (C) showing co-localization of each probe. Images of native RGC-5 cells following co-exposure to **2** (10  $\mu\text{M}$ , 3hrs) (row D) and ER Tracker Green (1  $\mu\text{M}$ , 30 min) (E, left), Mito Tracker Green (50 nM, 30 min) (E, middle), or C<sub>6</sub>-ceramide-NBD (Golgi Tracker, 2.5  $\mu\text{M}$ , 30 min) (E, right); overlay image of fluorescence fields (row E). Cells were counterstained with H33342 (pseudocolor blue) to show subcellular distribution relative to nuclei (50  $\mu\text{m}$  scale bar).



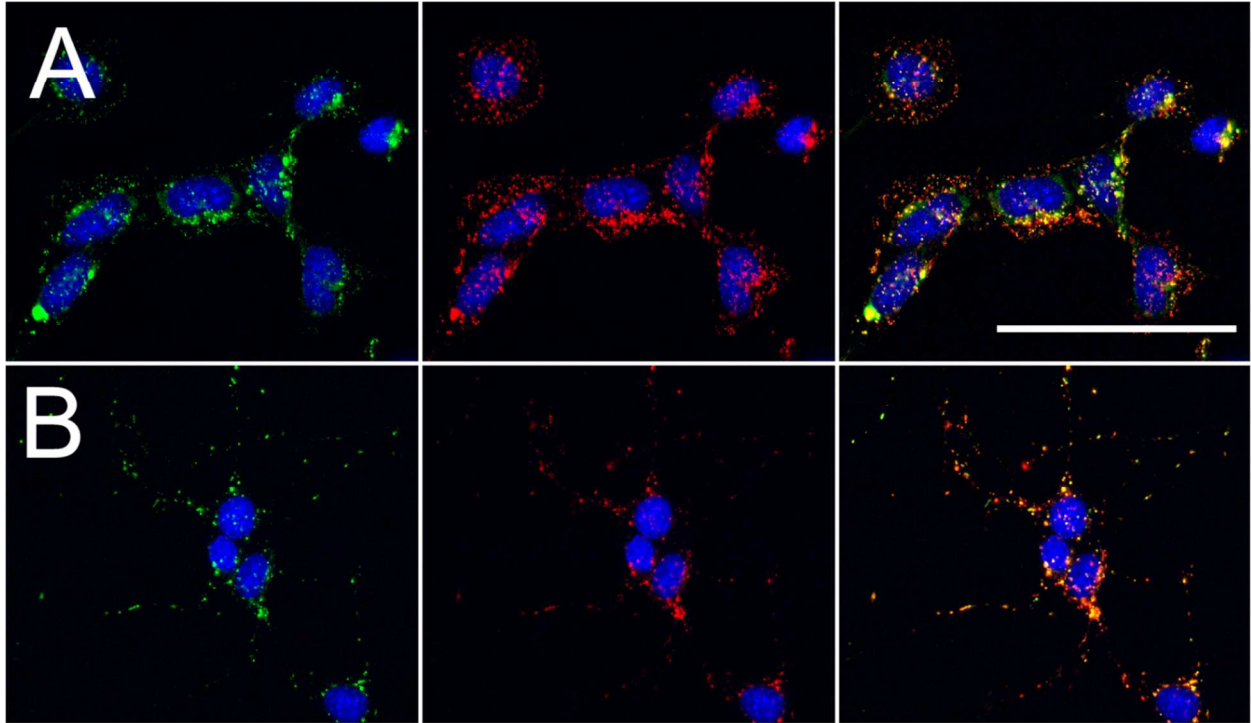

**Figure S8.** Fluorescence microscopy images of native (row A) and SS-differentiated RGC-5 (row B) cells following a 3 hr labeling with LysoTracker Red (left panels, pseudocolored green) and 10  $\mu$ M KcapQ647 (1) (middle panels, pseudocolored red). Right, composite images showing co-localization (yellow) of activated KcapQ647 (red) and LysoTracker (green) (50  $\mu$ m scale bar).

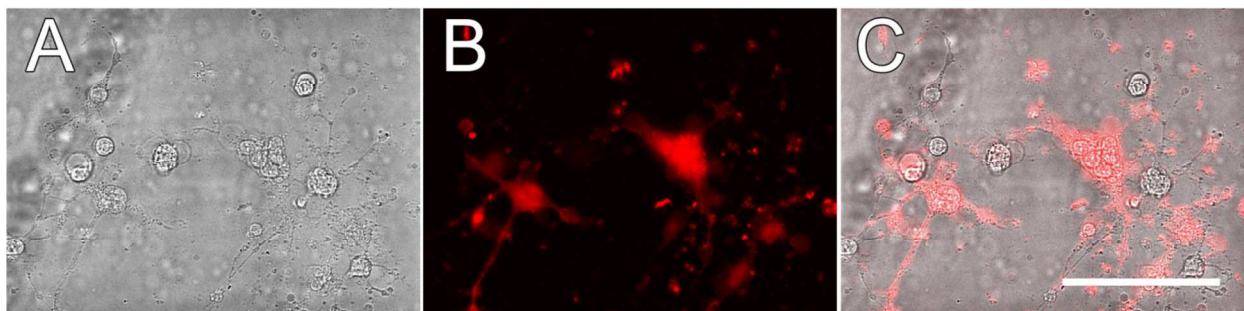

**Figure S9.** Transmitted light image of SS-differentiated RGC-5 cells undergoing ionomycin-induced apoptosis (10  $\mu$ M, 1 hr) (A) with concurrent activation of **1** (10  $\mu$ M, pseudocolor red, B). Overlay of panels A and B (C) (50  $\mu$ m scale bar).

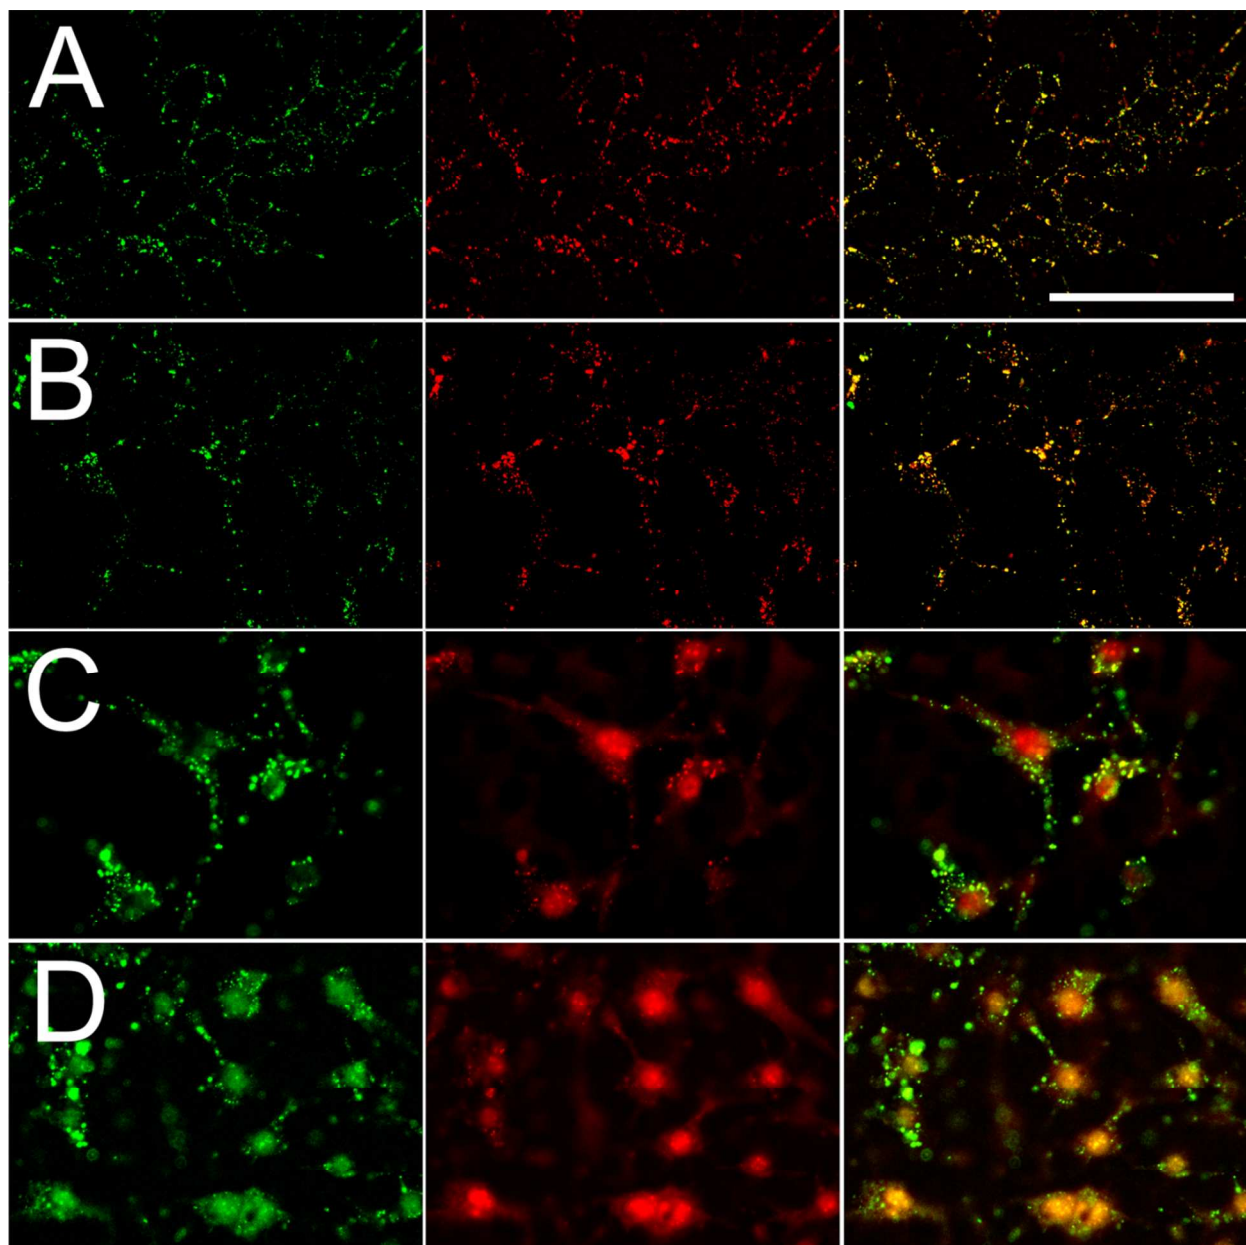

**Figure S10.** Fluorescence microscopy images of **5** (12  $\mu\text{M}$ ) distribution in SS-differentiated RGC-5 cells (row A); *D-5* (12  $\mu\text{M}$ ) distribution in SS-differentiated RGC-5 cells (row B); **5** (12  $\mu\text{M}$ ) distribution in ionomycin-treated (10  $\mu\text{M}$ ) SS-differentiated RGC-5 cells (row C); *D-5* (12  $\mu\text{M}$ ) distribution in ionomycin-treated (10  $\mu\text{M}$ ) SS-differentiated RGC-5 cells (row D). Left, fluorescence field for the Alexa Fluor 488-labeled C-terminus (pseudocolored green); middle, fluorescence for the Texas Red-labeled N-terminus (pseudocolored red); right, overlays of Alexa Fluor 488 and Texas Red images (50  $\mu\text{m}$  scale bar).
